# Supplementary material
Source: PubMed Central journal article supplement (PMC5932255)

1 **SUPPLEMENTAL INFORMATION**

2

3 **Structures of the gasdermin D C-terminal domains reveal mechanisms of autoinhibition**

4 Zhonghua Liu<sup>1</sup>, Chuanping Wang<sup>1</sup>, Joseph K. Rathkey<sup>1</sup>, Jie Yang<sup>1,2</sup>, George R. Dubyak<sup>2</sup>, Derek W.  
5 Abbott<sup>1</sup>, and Tsan Sam Xiao<sup>1,3\*</sup>

6 1 Department of Pathology, Case Western Reserve University, Cleveland, OH 44106 USA

7 2 Graduate program in Physiology and Biophysics, Department of Physiology and Biophysics, Case  
8 Western Reserve University, Cleveland, OH 44106 USA

9 3 Cleveland center for membrane and structural biology, Case Western Reserve University, Cleveland,  
10 OH 44106 USA

11

12 The supplemental data include three figures and one table.

13

14

15 **Figure S1. Related to Figure 1. Structures of the hGSDMD, mGSDMD, mGSDMA3, and**  
16 **hGSDMB.**

17 (A) Representative electron density maps for mGSDMD (gold) contoured at 1 sigma.

18 (B) Representative electron density maps for hGSDMD (cyan) contoured at 1 sigma.

19 (C) Superposition of structures for hGSDMD (cyan), mGSDMD (gold), mGSDMA3 (gray) and  
20 hGSDMB (green). Helices are represented as cylinders. The  $\beta$  sheet and  $\alpha$ 11 helix common for  
21 GSDMDs and mGSDMA3 but absent in hGSDMB are marked with a red oval. Structural differences  
22 near the  $\beta$ 1- $\beta$ 2 loop are marked with a black square.

23 (D) Highlight of major structural differences near the  $\beta$ 1- $\beta$ 2 loop between hGSDMB and other  
24 gasdermin structures. The  $C\alpha$  atom of residue F48 from mGSDMA3 is shown as a gray sphere.

25 (E & F) Highlight of major structural differences near the  $\alpha$ 7' helix region between mGSDMA3 (gray in  
26 E), GSDMDs (cyan and gold in F) and hGSDMB (green in F).

27

28 **Figure S2. Related to Figure 2. The gasdermin N- and C-domain interface.**

29 (A-C) Electrostatic charge surface of the N- and C-domains for hGSDMD (A), mGSDMD (B) and  
30 mGSDMA3 (C). The full-length hGSDMD and mGSDMD structural models were created using the full-  
31 length mGSDMA3 as a template. The surface representations on top of the three panels are the same  
32 as those in Figure 2. The open-book views of the N- and C-domains show charge-charge  
33 complementarity with the N-domains largely positively charged (blue), and the C-domains negatively  
34 charged (red). The electrostatic charge surface is displayed on a scale of  $-5kT/e$  (red) to  $5 kT/e$  (blue).  
35 Crucial residues at the site I interface are marked.

36

37 **Figure S3. Related to Figure 4. Propidium iodide uptake by macrophages expressing WT or**  
38 **mutant mGSDMD.**

39 Propidium iodide uptake by macrophages reconstituted with WT mGSDMD or the Y376D mutant, in  
40 the presence or absence of *Salmonella*. Significant increase in PI uptake was only observed in the  
41 presence of *Salmonella* infection. The average  $\pm$  SD is shown for three independent experiments.  
42 Asterisk denotes P value  $<0.05$  calculated by one-way ANOVA.

43

44

45 **Table S1. Related to Figure 1. X-ray Diffraction Data Collection and Refinement Statistics**

|                                                        | mGSDMD-C<br>(SeMet) | mGSDMD-C            | hGSDMD-C                         |
|--------------------------------------------------------|---------------------|---------------------|----------------------------------|
| <b>Data Collection</b>                                 |                     |                     |                                  |
| Spacegroup                                             | P1                  | P1                  | P2 <sub>1</sub> 2 <sub>1</sub> 2 |
| Unit cell (a, b, c) (Å)                                | 45.3, 56.8, 82.0    | 45.3, 56.8, 81.8    | 47.8, 108.5, 45.9                |
| (a, b, γ) (°)                                          | 94.8, 102.5, 98.2   | 94.9, 102.8, 99.0   | 90, 90, 90                       |
| Wavelength (Å)                                         | 0.9793              | 0.9800              | 0.9800                           |
| Resolution (Å) (Last shell)                            | 50-2.02 (2.07-2.02) | 50-1.76 (1.81-1.76) | 50-2.90 (2.98-2.90)              |
| No of reflections (total/unique)                       | 196629/50375        | 220325/75173        | 37766/5664                       |
| Completeness (%) (Last shell)                          | 97.9 (96.0)         | 97.1 (95.8)         | 99.9 (100)                       |
| <I/σ(I)> (Last shell)                                  | 12.0 (1.8)          | 10.1 (2.1)          | 17.5 (1.8)                       |
| R <sub>meas</sub> (%) <sup>a</sup> (Last shell)        | 8.7 (77.7)          | 8.8 (84.6)          | 10.2 (95.9)                      |
| CC ½ (%) <sup>b</sup> (Last shell)                     | 99.8 (70.3)         | 99.5 (55.5)         | 99.8 (86.5)                      |
| SigAno <sup>c</sup>                                    | 0.88                |                     |                                  |
| <b>SAD Phasing</b>                                     |                     |                     |                                  |
| Se sites (found/total)                                 | 8/8                 |                     |                                  |
| FOM <sup>d</sup> (Initial/DM/model building)           | 0.23/0.45/0.88      |                     |                                  |
| <b>Refinement</b>                                      |                     |                     |                                  |
| Number of atoms (protein/solvent)                      |                     | 6021/587            | 1445/0                           |
| Rmsd bonds length (Å)/angles (°)                       |                     | 0.007/1.016         | 0.008/1.195                      |
| R <sub>work</sub> / R <sub>free</sub> (%) <sup>e</sup> |                     | 16.1/18.6           | 23.2/29.0                        |
| Ramachandran plot<br>favored/disallowed <sup>f</sup>   |                     | 99.0/0.0            | 91.5/0.0                         |
| PDB code                                               |                     | 6AO3                | 6AO4                             |

46

47

48 <sup>a</sup> R<sub>meas</sub> =  $\sum_h \{N_h / [N_h - 1]\}^{1/2} \sum_i |I_i(h) - \langle I(h) \rangle| / \sum_h \sum_i I_i(h)$ , where I<sub>i</sub>(h) and <I(h)> are the ith and mean  
49 measurement of the intensity of reflection h, and N<sub>h</sub> is the multiplicity (Diederichs and Karplus, 1997).

50 <sup>b</sup> CC<sub>1/2</sub> =  $\sum (x - \langle x \rangle) (y - \langle y \rangle) / [\sum (x - \langle x \rangle)^2 \sum (y - \langle y \rangle)^2]^{1/2}$  where x and y are randomly split half datasets.

51 This is the Pearson's correlation coefficient of randomly split half datasets (Karplus and Diederichs,  
52 2012).

53 <sup>c</sup> SigAno =  $|F(+)-F(-)| / \sigma$  where  $F(+)$  and  $F(-)$  are structure factor estimates obtained from the merged  
54 intensity observations in each parity class, and  $\sigma$  is the standard deviation.

55 <sup>d</sup> FOM =  $\int P(\alpha) \exp(i\alpha) d\alpha / \int P(\alpha) d\alpha = \langle \cos(\Delta\alpha) \rangle$  where  $P(\alpha)$  is the probability of the phase  $\alpha$  being  
56 the best phase and the  $\Delta\alpha = \alpha_{\text{best}} - \alpha$  is the error in the phase angle at  $\alpha$ . The figure of merit is the  
57 expected value of the cosine of the phase error.

58 <sup>e</sup>  $R_{\text{work}} = \sum_h ||F_{\text{obs}}(h)| - |F_{\text{calc}}(h)|| / \sum_h |F_{\text{obs}}(h)|$ , where  $F_{\text{obs}}(h)$  and  $F_{\text{calc}}(h)$  are the observed and calculated  
59 structure factors, respectively;  $R_{\text{free}}$  is the R value obtained for a test set of reflections consisting of a  
60 randomly selected 5% subset of the data set excluded from refinement.

61 <sup>f</sup> Values from the Molprobit server (<http://molprobit.biochem.duke.edu/>).

62

63

64 **Table S2. Related to STAR Methods and the Key Resources Table. Oligonucleotides used in**  
 65 **this study.**

| Oligonucleotides                                                       | SOURCE     | IDENTIFIER |
|------------------------------------------------------------------------|------------|------------|
| hGSDMD-FL Forward:<br>CGGGATCCATGGGGTCCGGCCTTTGAGCGG                   | This paper | N/A        |
| hGSDMD-FL Reverse:<br>CGCGTGCACCTAGTGGGGCTCCTGGCTCAG                   | This paper | N/A        |
| hGSDMD-C Forward:<br>CGGGATCCGTCCTGCGGAGGGAGCGTTC                      | This paper | N/A        |
| hGSDMD-N Forward:<br>CAGAGAACAGATTGGTGGATCCATGGGGTCCGGCCT<br>TTGAGCGGG | This paper | N/A        |
| hGSDMD-N Reverse:<br>GGTGCTCGAGTGCGGCCGCTCATGTGCGGGGTGG<br>CTGGAAGGTC  | This paper | N/A        |
| mGSDMD-FL Forward:<br>CGGGATCCATGCCATCGGCCTTTGAGAAAG                   | This paper | N/A        |
| mGSDMD-FL Reverse:<br>CCGCTCGAGCTAACAAGGTTTCTGGCCTAG                   | This paper | N/A        |
| mGSDMD-C Forward:<br>CGGGATCCGGGATTGATGAGGAGGAATTAAT                   | This paper | N/A        |
| mGSDMD-N Forward:<br>CAGAGAACAGATTGGTGGATCCATGCCATCGGCCT<br>TTGAGAAAG  | This paper | N/A        |
| mGSDMD-N Reverse:<br>GGTGCTCGAGTGCGGCCGCTCATGAGGAGGGCTC<br>AAAGGCCTC   | This paper | N/A        |
| mGSDMD-FL L292D Forward *:<br>CGACTATGCTGAGGTGAAGGCTTGCTC              | This paper | N/A        |
| mGSDMD-FL L292D Reverse:<br>CCCTGGAAGTCTGCCGCCTCAATTAAT                | This paper | N/A        |
| mGSDMD-FL Y376D Forward *:<br>GACCTGCTGGGAGCACTGGCTGTGCTGAGT           | This paper | N/A        |
| mGSDMD-FL Y376D Reverse:<br>GAAGATAGGGGCTGCGAGTTCCGGCAC                | This paper | N/A        |
| mGSDMD-FL A380D Forward *:<br>GGGAGATCTGGCTGTGCTGAGTGAAAC              | This paper | N/A        |

|                                                               |            |     |
|---------------------------------------------------------------|------------|-----|
| mGSDMD-FL A380D Reverse:<br>AGCAGGTAGAAGATAGGGGCTGCGAGT       | This paper | N/A |
| mGSDMD-FL T387D Forward *:<br>GACCAGCAGCAGCTGCTAGCTAAGGCTC    | This paper | N/A |
| mGSDMD-FL T387D Reverse:<br>TTCACCTCAGCACAGCCAGTGCTCCC        | This paper | N/A |
| mGSDMD-FL L391D Forward:<br>CTAGCTAAGGCTCTGGAGACAACG          | This paper | N/A |
| mGSDMD-FL L391D Reverse *:<br>GTCCTGCTGCTGGGTTTTCACTCAGCACAGC | This paper | N/A |
| mGSDMD-FL W442D Forward *:<br>GATGTCTTGCTAGAAGAATGTGGCCTA     | This paper | N/A |
| mGSDMD-FL W442D Reverse:<br>GGTGGGATTCTTTTCATCCCAGCAG         | This paper | N/A |
| mGSDMD-FL V443D Forward *:<br>TGGGACTTGCTAGAAGAATGTGGCCTAAG   | This paper | N/A |
| mGSDMD-FL V443D Reverse:<br>GGTGGGATTCTTTTCATCCCAGCAG         | This paper | N/A |

66

67 \* Red-colored nucleotides mark the mutated codons.

68

# Figure S1

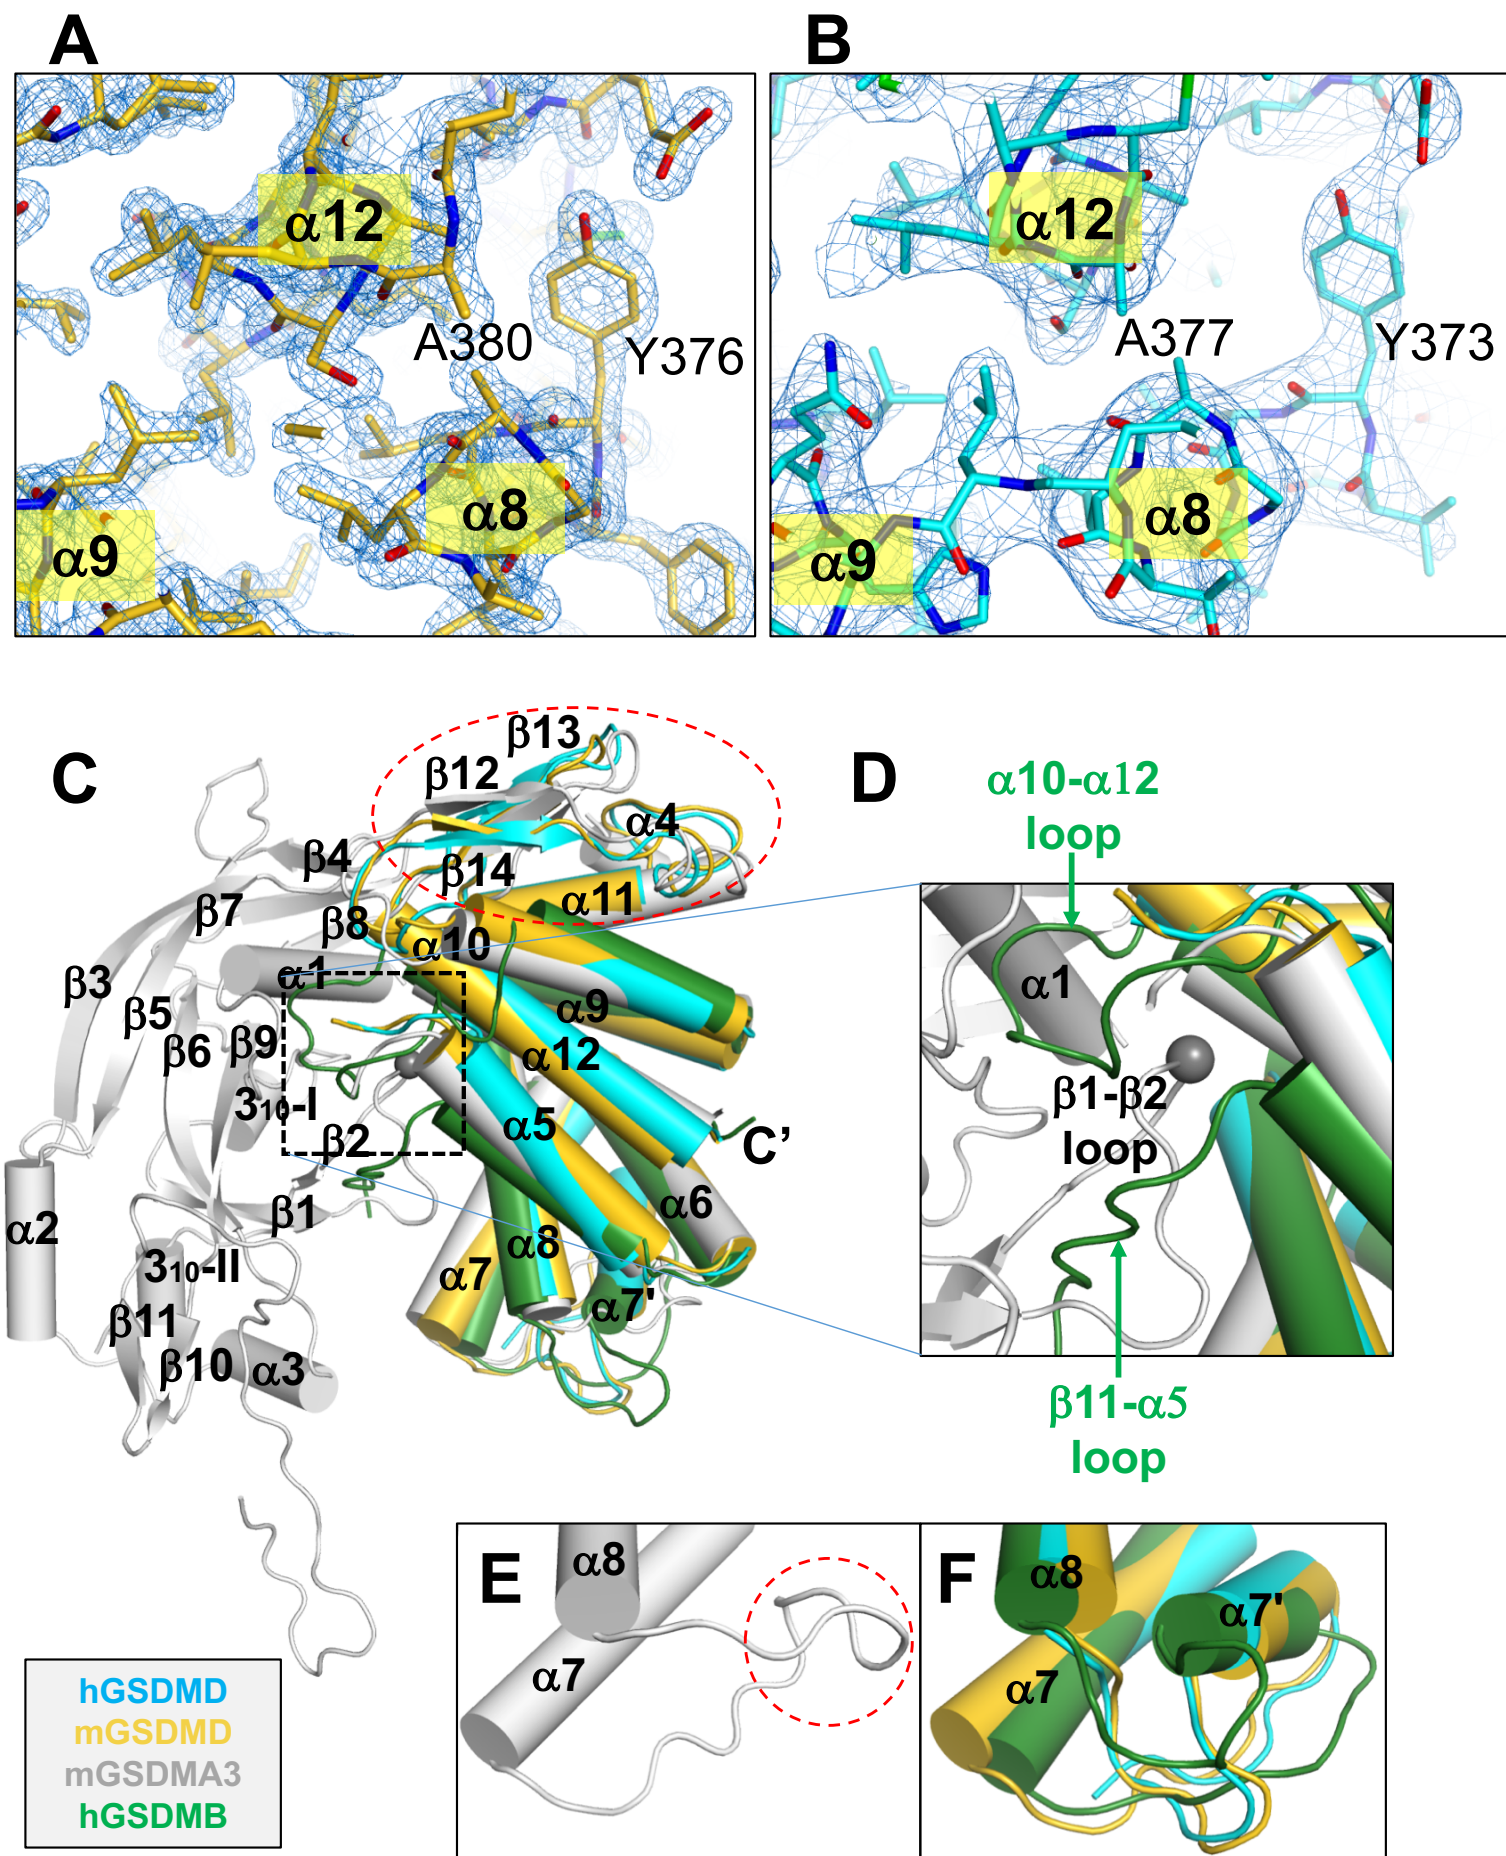



# Figure S2

## A hGSDMD FL model

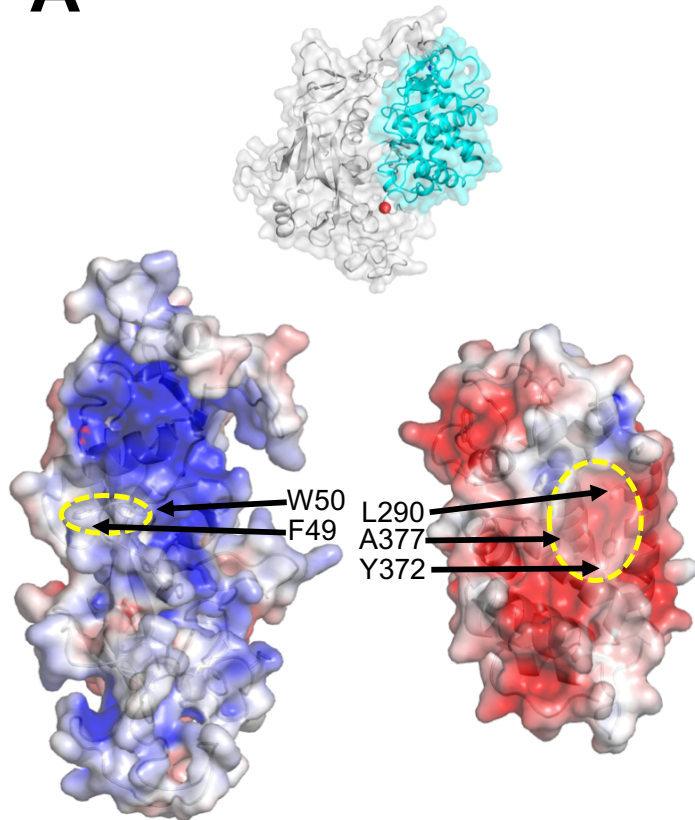

## B mGSDMD FL model

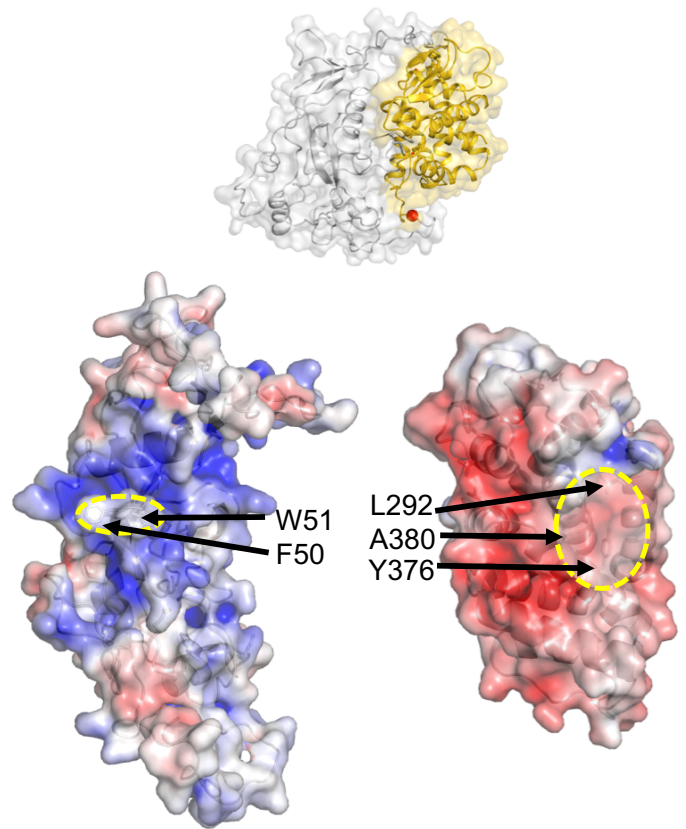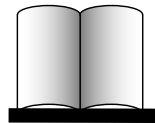

## C mGSDMA3 (5B5R)

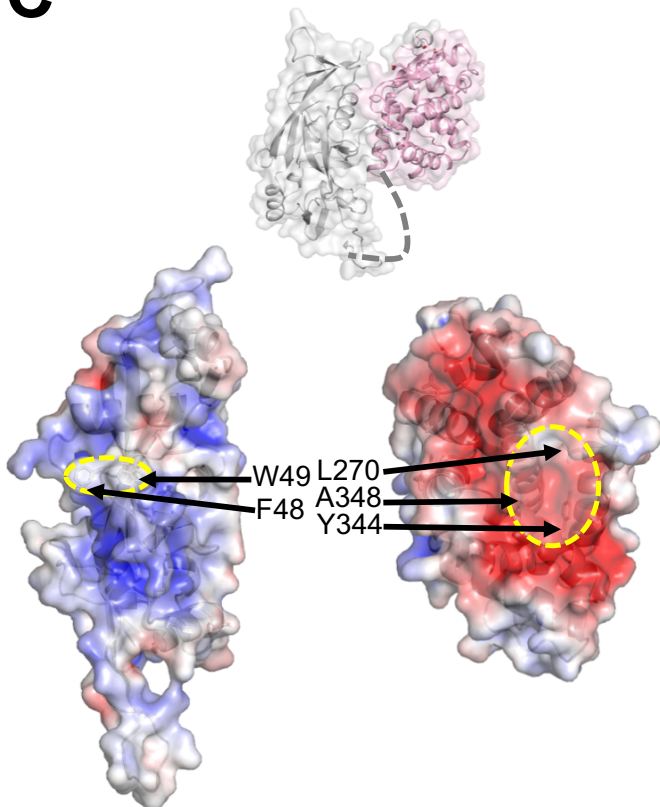



# Figure S3

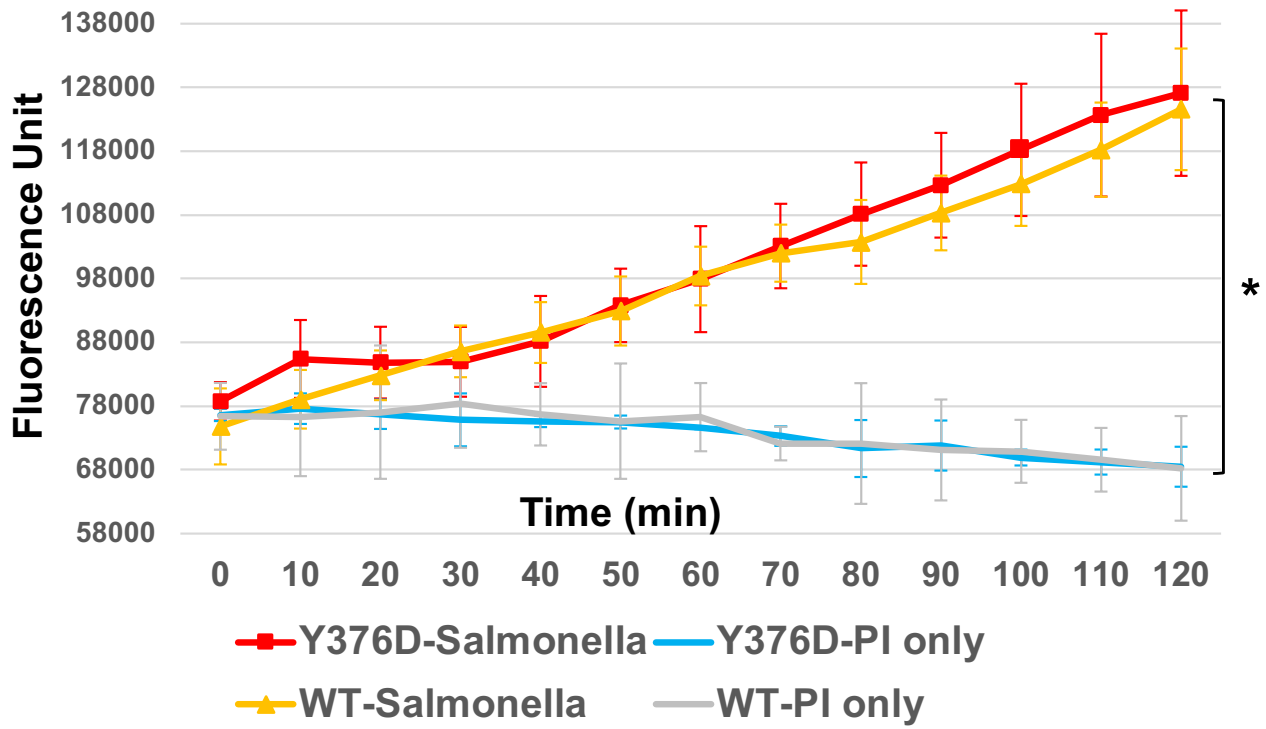

Supplement: NIHMS952844-supplement.pdf [file NIHMS952844-supplement.pdf]
